# Supplementary material for: Racial-Ethnic Differences in Off-Label Antidepressant Use, by Insurance Type
Source: Atypon-hosted journal article supplement (doi:10.1176/appi.ps.201600445), 2017-08-15
Supplement: appi.ps.201600445.ds001.pdf [file appi.ps.201600445.ds001.pdf]

Appendix A The list of antidepressants filled and the percentage of off-label use by generic name and therapeutic class of drugs between 2000 and 2010

| Therapeutic Class (TC) | Sub-TC | Drug Name <sup>a</sup> (Genetic) | Number of Antidepressant Prescriptions Filled | Number of Off-label Use | Percentage of Off-label Use |
|------------------------|--------|----------------------------------|-----------------------------------------------|-------------------------|-----------------------------|
| Miscellaneous          | 76     | Bupropion                        | 4,197                                         | 701                     | 16.70                       |
|                        |        | Maprotiline                      | 14                                            | 14                      | 100.00                      |
|                        |        | Mirtazapine                      | 946                                           | 190                     | 20.08                       |
|                        |        | Nefazodone                       | 722                                           | 52                      | 7.20                        |
|                        |        | Trazodone                        | 2,700                                         | 730                     | 27.04                       |
|                        |        | Venlafaxine                      | 2,949                                         | 421                     | 14.28                       |
|                        |        | Others                           | 4                                             | 1                       | 25.00                       |
|                        |        | Sub-total                        |                                               | 11,532                  | 2,109                       |
| SSRI <sup>b</sup>      | 208    | Alprazolam                       | 3                                             | 0                       | 0                           |
|                        |        | Citalopram                       | 14,494                                        | 1,939                   | 13.38                       |
|                        |        | Escitalopram                     | 15,141                                        | 1,767                   | 11.67                       |
|                        |        | Fluoxetine                       | 20,715                                        | 3,097                   | 14.95                       |
|                        |        | Fluvoxamine                      | 672                                           | 95                      | 14.14                       |
|                        |        | Lorazepam                        | 2                                             | 0                       | 0                           |
|                        |        | Paroxetine                       | 20,380                                        | 2,640                   | 12.95                       |
|                        |        | Sertraline                       | 26,664                                        | 3,439                   | 12.90                       |
|                        |        | Trazodone                        | 9                                             | 9                       | 100.00                      |
|                        |        | Others                           | 33                                            | 18                      | 54.55                       |
| Sub-total              |        | 98,113                           | 13,004                                        | 13.25                   |                             |
| Tricyclic              | 209    | Amitriptyline                    | 13,881                                        | 6,651                   | 47.91                       |
|                        |        | Amoxapine                        | 57                                            | 9                       | 15.79                       |
|                        |        | Amoxicillin                      | 3                                             | 0                       | 0                           |
|                        |        | Anafranil                        | 26                                            | 10                      | 38.46                       |
|                        |        | Clomipramine                     | 475                                           | 101                     | 21.26                       |
|                        |        | Desipramine                      | 345                                           | 128                     | 37.10                       |
|                        |        | Imipramine                       | 1,573                                         | 612                     | 38.90                       |
|                        |        | Nortriptyline                    | 2,713                                         | 1,368                   | 50.42                       |

|                   |     |                 |         |        |        |
|-------------------|-----|-----------------|---------|--------|--------|
|                   |     | Protriptyline   | 45      | 5      | 11.11  |
|                   |     | Trimipramine    | 27      | 0      | 0      |
|                   |     | Others          | 20      | 20     | 100.00 |
|                   |     | Sub-total       | 19,165  | 8,904  | 46.46  |
|                   |     | Phenelzine      | 89      | 18     | 20.22  |
| MAOI <sup>c</sup> | 250 | Tranylcypromine | 51      | 0      | 0      |
|                   |     | Sub-total       | 140     | 18     | 12.86  |
|                   |     | Nefazodone      | 511     | 73     | 14.29  |
| Phenylpiperazine  | 306 | Trazodone       | 11,251  | 2,852  | 25.35  |
|                   |     | Sub-total       | 11,762  | 2,925  | 24.87  |
|                   |     | Maprotiline     | 7       | 0      | 0      |
| Tetracyclic       | 307 | Mirtazapine     | 3,616   | 827    | 22.87  |
|                   |     | Sub-total       | 3,623   | 827    | 22.83  |
|                   |     | Desvenlafaxine  | 315     | 14     | 4.44   |
|                   |     | Duloxetine      | 6,291   | 993    | 15.78  |
|                   |     | Milnacipran     | 77      | 30     | 38.96  |
| SNRI <sup>d</sup> | 308 | Venlafaxine     | 11,709  | 1,589  | 13.57  |
|                   |     | Others          | 6       | 0      | 0      |
|                   |     | Sub-total       | 18,398  | 2,626  | 14.27  |
| Total             |     |                 | 162,733 | 30,413 | 18.69  |

<sup>a</sup> Some drugs are classified into multiple therapeutic classes.

<sup>b</sup> SSRI stands for Selective Serotonin Reuptake Inhibitor.

<sup>c</sup> MAOI stands for Monoamine Oxidase Inhibitors.

<sup>d</sup> SNRI stands for Serotonin-Norepinephrine Reuptake Inhibitor.

## Appendix B The list of medical conditions reported by ICD-9-CM codes for which antidepressant drugs were frequently prescribed off-label

| ICD-9-CM Codes                        |                |                             | Number of Off-Label Prescriptions Filled<br>(N=30,413) | Share of Off-Label Use (%) |
|---------------------------------------|----------------|-----------------------------|--------------------------------------------------------|----------------------------|
| First 3-digit<br>(Medical conditions) | Sub-categories | Description                 |                                                        |                            |
| 780                                   | 780.0          | Alteration of consciousness | 4,164                                                  | 13.69                      |
| (General symptoms)                    | 780.1          | Hallucinations              |                                                        |                            |
|                                       | 780.2          | Syncope and collapse        |                                                        |                            |

|                                          |       |                                                                    |       |      |
|------------------------------------------|-------|--------------------------------------------------------------------|-------|------|
|                                          | 780.3 | Convulsions                                                        |       |      |
|                                          | 780.4 | Dizziness and giddiness                                            |       |      |
|                                          | 780.5 | Sleep disturbances                                                 |       |      |
|                                          | 780.6 | Fever and other physiologic disturbances of temperature regulation |       |      |
|                                          | 780.7 | Malaise and fatigue                                                |       |      |
|                                          | 780.8 | Generalized hyperhidrosis                                          |       |      |
|                                          | 780.9 | Other general symptoms                                             |       |      |
|                                          | V68.0 | Issue of medical certificates                                      |       |      |
| V68                                      | V68.1 | Issue of repeat prescriptions                                      |       |      |
| (Encounters for administrative purposes) | V68.2 | Request for expert evidence                                        | 2,870 | 9.44 |
|                                          | V68.8 | Encounters for other specified administrative purpose              |       |      |
|                                          | V68.9 | Encounters for unspecified administrative purpose                  |       |      |
|                                          | 308.0 | Predominant disturbance of emotions                                |       |      |
|                                          | 308.1 | Predominant disturbance of consciousness                           |       |      |
| 308                                      | 308.2 | Predominant psychomotor disturbance                                |       |      |
| (Acute reaction to stress)               | 308.3 | Other acute reactions to stress                                    | 1,900 | 6.25 |
|                                          | 308.4 | Mixed disorders as reaction to stress                              |       |      |
|                                          | 308.9 | Unspecified acute reaction to stress                               |       |      |
|                                          | 346.0 | Migraine with aura                                                 |       |      |
|                                          | 346.1 | Migraine without aura                                              |       |      |
|                                          | 346.2 | Variants of migraine, not elsewhere classified                     |       |      |
|                                          | 346.3 | Hemiplegic migraine                                                |       |      |
| 346                                      | 346.4 | Menstrual migraine                                                 |       |      |
| (Migraine)                               | 346.5 | Persistent migraine aura without cerebral infarction               | 1,626 | 5.35 |
|                                          | 346.6 | Persistent migraine aura with cerebral infarction                  |       |      |
|                                          | 346.7 | Chronic migraine without aura                                      |       |      |
|                                          | 346.8 | Other forms of migraine                                            |       |      |
|                                          | 346.9 | Migraine unspecified                                               |       |      |
| 729                                      | 729.0 | Rheumatism unspecified and fibrositis                              | 1,426 | 4.69 |
| (Other disorders of soft tissues)        | 729.1 | Myalgia and myositis unspecified                                   |       |      |
|                                          | 729.2 | Neuralgia neuritis and radiculitis unspecified                     |       |      |

|                                                                   |       |                                                                      |       |      |
|-------------------------------------------------------------------|-------|----------------------------------------------------------------------|-------|------|
|                                                                   | 729.3 | Panniculitis unspecified                                             |       |      |
|                                                                   | 729.4 | Fasciitis unspecified                                                |       |      |
|                                                                   | 729.5 | Pain in limb                                                         |       |      |
|                                                                   | 729.6 | Residual foreign body in soft tissue                                 |       |      |
|                                                                   | 729.7 | Nontraumatic compartment syndrome                                    |       |      |
|                                                                   | 729.8 | Other musculoskeletal symptoms referable to limbs                    |       |      |
|                                                                   | 729.9 | Other and unspecified disorders of soft tissue                       |       |      |
| <hr/>                                                             |       |                                                                      |       |      |
|                                                                   | 314.0 | Attention deficit disorder of childhood                              |       |      |
| 314                                                               | 314.1 | Hyperkinesis of childhood with developmental delay                   |       |      |
| (Hyperkinetic syndrome of childhood)                              | 314.2 | Hyperkinetic conduct disorder of childhood                           | 1,094 | 3.60 |
|                                                                   | 314.8 | Other specified manifestations of hyperkinetic syndrome of childhood |       |      |
|                                                                   | 314.9 | Unspecified hyperkinetic syndrome of childhood                       |       |      |
| <hr/>                                                             |       |                                                                      |       |      |
|                                                                   | 627.0 | Premenopausal menorrhagia                                            |       |      |
|                                                                   | 627.1 | Postmenopausal bleeding                                              |       |      |
| 627                                                               | 627.2 | Symptomatic menopausal or female climacteric states                  |       |      |
| (Menopausal and postmenopausal disorders)                         | 627.3 | Postmenopausal atrophic vaginitis                                    | 881   | 2.90 |
|                                                                   | 627.4 | Symptomatic states associated with artificial menopause              |       |      |
|                                                                   | 627.8 | Other specified menopausal and postmenopausal disorders              |       |      |
|                                                                   | 627.9 | Unspecified menopausal and postmenopausal disorder                   |       |      |
| <hr/>                                                             |       |                                                                      |       |      |
| 401                                                               | 401.0 | Malignant essential hypertension                                     |       |      |
| (Essential hypertension)                                          | 401.1 | Benign essential hypertension                                        | 875   | 2.88 |
|                                                                   | 401.9 | Unspecified essential hypertension                                   |       |      |
| <hr/>                                                             |       |                                                                      |       |      |
|                                                                   | 799.0 | Asphyxia and hypoxemia                                               |       |      |
|                                                                   | 799.1 | Respiratory arrest                                                   |       |      |
| 799                                                               | 799.2 | Nervousness                                                          |       |      |
| (Other ill-defined and unknown causes of morbidity and mortality) | 799.3 | Debility unspecified                                                 | 732   | 2.41 |
|                                                                   | 799.4 | Cachexia                                                             |       |      |
|                                                                   | 799.8 | Other ill-defined conditions                                         |       |      |
|                                                                   | 799.9 | Other unknown and unspecified cause of morbidity or mortality        |       |      |
| <hr/>                                                             |       |                                                                      |       |      |
| 295                                                               | 295.0 | Simple type schizophrenia                                            | 723   | 2.38 |
| (Schizophrenic)                                                   | 295.1 | Disorganized type schizophrenia                                      |       |      |

|                     |       |                                                                |        |       |
|---------------------|-------|----------------------------------------------------------------|--------|-------|
| disorders)          | 295.2 | Catatonic type schizophrenia                                   |        |       |
|                     | 295.3 | Paranoid type schizophrenia                                    |        |       |
|                     | 295.4 | Schizophreniform disorder                                      |        |       |
|                     | 295.5 | Latent schizophrenia                                           |        |       |
|                     | 295.6 | Residual type schizophrenia                                    |        |       |
|                     | 295.7 | Schizo-affective disorder                                      |        |       |
|                     | 295.8 | Other specified types of schizophrenia                         |        |       |
|                     | 295.9 | Unspecified schizophrenia                                      |        |       |
| <hr/>               |       |                                                                |        |       |
|                     | 625.0 | Dyspareunia                                                    |        |       |
|                     | 625.1 | Vaginismus                                                     |        |       |
|                     | 625.2 | Mittelschmerz                                                  |        |       |
| 625                 | 625.3 | Dysmenorrhea                                                   |        |       |
| (Pain and other     | 625.4 | Premenstrual tension syndromes                                 | 716    | 2.35  |
| symptoms associated | 625.5 | Pelvic congestion syndrome                                     |        |       |
| with female genital | 625.6 | Stress incontinence female                                     |        |       |
| organs)             | 625.7 | Vulvodynia                                                     |        |       |
|                     | 625.8 | Other specified symptoms associated with female genital organs |        |       |
|                     | 625.9 | Unspecified symptom associated with female genital organs      |        |       |
| <hr/>               |       |                                                                |        |       |
| Other medical       |       |                                                                | 13,406 | 44.08 |
| conditions          |       |                                                                |        |       |
| <hr/>               |       |                                                                |        |       |
